# Supplementary material for: A metal–organic framework with a 9-phenylcarbazole moiety as a fluorescent tag for picric acid explosive detection: collaboration of electron transfer, hydrogen bonding and size matching
Source: Royal Society of Chemistry journal article supplement (doi:10.1039/c4ra07067d), 2014-01-01
Supplement: c4ra07067d1.pdf [file c4ra07067d1.pdf]

**A metal–organic framework with a 9-phenylcarbazole moiety as a  
fluorescent tag for picric acid explosive detection: collaboration of  
electron transfer, hydrogen bonding and size matching**

Xiaoli Jiang,<sup>a</sup> Yanhong Liu,<sup>a</sup> Pengyan Wu,<sup>\*a</sup> Lei Wang,<sup>a</sup> Qiyuan Wang,<sup>a</sup> Guangzhou Zhu,<sup>a</sup> Xiu-  
ling Li<sup>a</sup> and Jian Wang<sup>\*a</sup>

*<sup>a</sup>School of Chemistry and Chemical Engineering & Jiangsu Key Laboratory of Green Synthetic Chemistry for Functional  
Materials, Jiangsu Normal University, Xuzhou, Jiangsu, 221116, People's Republic of China*

**Contents**

|                                                                                     |            |
|-------------------------------------------------------------------------------------|------------|
| <b>1. Materials and Methods.</b>                                                    | <b>S2</b>  |
| <b>2. Syntheses and Reactions.</b>                                                  | <b>S3</b>  |
| <b>3. X-ray Crystallography (Single-crystal diffraction) and Characterizations.</b> | <b>S5</b>  |
| <b>4. Studies on the nitro-explosives detection based on Zn–PDA.</b>                | <b>S8</b>  |
| <b>5. References.</b>                                                               | <b>S12</b> |

## 1. Materials and Methods.

All chemicals were of reagent grade quality obtained from commercial sources and used without further purification. 9-Phenylcarbazole was purchased from Qingdao Frontierchem Co., Ltd., 4-Hydroxy-4'-nitrobiphenyl and 4-Aminophenol was purchased from J&K Scientific, Picric Acid and the other nitroaromatics were provided from Xiya Reagent Company (China).

The elemental analyses of C, H and N were performed on a Vario EL III elemental analyzer. Mass spectra were carried out on a Bruker micro TOF mass spectrometer.

<sup>1</sup>HNMR spectra were measured on a Bruker-400 spectrometer with Me<sub>4</sub>Si as an internal standard.

X-Ray powder diffraction (XRD) patterns of the Zn-PDA was recorded on a Rigaku D/max-2400 X-ray powder diffractometer (Japan) using Cu K $\alpha$  ( $\lambda = 1.5405 \text{ \AA}$ ) radiation.

Thermogravimetric analysis (TGA) was carried out at a ramp rate of 5 °C/min in a nitrogen flow with a Mettler-Toledo TGA/SDTA851 instrument.

FT-IR spectra were recorded as KBr pellets on Bruker Optics TENSOR 27 FT-IR spectrophotometer.

The solution fluorescent spectra were measured on Hitachi F-4500. Both excitation and emission slit widths were 2.5 nm. The Zn-PDA emulsion was prepared by introducing 1 mg of Zn-PDA powder into 3.00 mL of ethanol, the intensity was recorded at 366 nm, excitation at 342 nm. For nitro-aromatic molecular detection, the high concentration stock solutions of related nitro-analysts ( $2.0 \times 10^{-2} \text{ M}$ ) were prepared directly in ethanol solvents.

## 2. Syntheses and Reactions.

### 2.1 Synthesis of the H<sub>2</sub>PDA ligand.

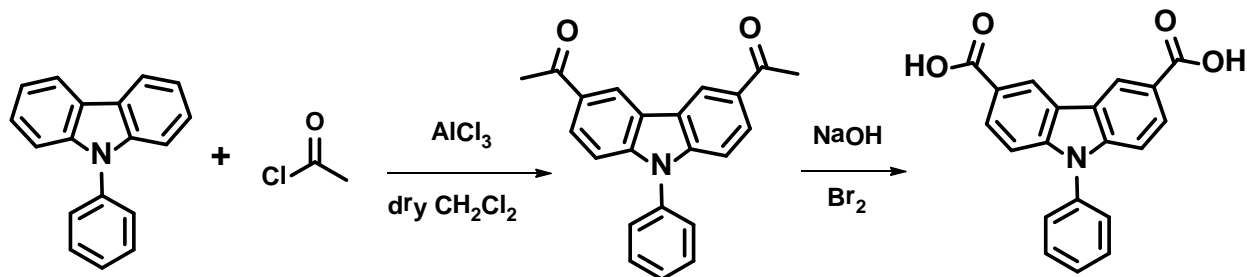

#### (a) Synthesis of 3,6-diacetyl 9-phenylcarbazole.

To the solution of 9-phenylcarbazole (2.0 g, 8.2 mmol) and 2.4 g (18.0 mmol) AlCl<sub>3</sub> in 100 mL dry CH<sub>2</sub>Cl<sub>2</sub>, 2.7 mL (28.28 mmol) acetyl chloride in 30 mL dry CH<sub>2</sub>Cl<sub>2</sub> was added dropwisely. Then the reaction was carried out at room temperature for 12 hours and 100 mL water was added. The aqueous layer was further extracted with CH<sub>2</sub>Cl<sub>2</sub> (3 × 150 mL); the combined organic layers were dried by Na<sub>2</sub>SO<sub>4</sub>. The solution was concentrated under reduced pressure to give the crude product, which was purified by flash column chromatography on silica gel (1: 10 hexanes–CH<sub>2</sub>Cl<sub>2</sub>) to afford a yellow solid (1.46 g, 54.3 %). <sup>1</sup>H NMR (CDCl<sub>3</sub>, ppm): δ 9.16 (s, 2H<sub>Ar</sub>), 8.08 (d, *J* = 8.0 Hz, 2H<sub>Ar</sub>), 7.73 (d, *J* = 8.0 Hz, 2H<sub>Ar</sub>), 7.67-7.61 (m, 3H<sub>Ar</sub>), 7.42 (d, *J* = 8.0 Hz, 2H<sub>Ar</sub>), 2.72 (s, 6H<sub>-COCH<sub>3</sub></sub>).

#### (b) Synthesis of 9-phenylcarbazole-3,6-dicarboxylic acid.<sup>S1</sup>

3 mL Br<sub>2</sub> were added dropwisely to the solution of NaOH (7 g, 0.18 mol) in 30 mL water on ice-bath, and further stirred for 20 min. The solution were dumpage to a isobarically funnel and were added dropwisely to a solution of 3,6-diacetyl 9-phenylcarbazole (1.2 g, 3.6 mmol) in 30 mL 1,4-Dioxane on 45 °C during 5 h. Then the mixture was put on ice-bath, saturated

hydroxylamine HCl was added to deoxidize excessive sub-bromo-sodium. The solution was acidified by muriatic acid and the solid product was filtered and dried under vacuum. The crude was recrystallized from acetic acid to afford pure products as a white solid. (1.0 g, 84.5 %).  $^1\text{H}$  NMR (DMSO- $d_6$ , ppm):  $\delta$  12.84 (s,  $2\text{H}_{\text{COOH}}$ ), 9.0 (s,  $2\text{H}_{\text{Ar}}$ ), 8.10 (d,  $J = 8.0$  Hz,  $2\text{H}_{\text{Ar}}$ ), 7.76-7.63 (m,  $5\text{H}_{\text{Ar}}$ ), 7.44 (d,  $J = 8.0$  Hz,  $2\text{H}_{\text{Ar}}$ ).  $^{13}\text{C}$  NMR (DMSO- $d_6$ , ppm):  $\delta$  167.7 ( $\text{C}_{\text{COOH}}$ ), 143.5 ( $\text{C}_{\text{Ar}}$ ), 135.9 ( $\text{C}_{\text{Ar}}$ ), 130.5 ( $\text{C}_{\text{Ar}}$ ), 128.7 ( $\text{C}_{\text{Ar}}$ ), 128.3 ( $\text{C}_{\text{Ar}}$ ), 127.1 ( $\text{C}_{\text{Ar}}$ ), 123.6 ( $\text{C}_{\text{Ar}}$ ), 123.0 ( $\text{C}_{\text{Ar}}$ ), 122.5 ( $\text{C}_{\text{Ar}}$ ), 109.9 ( $\text{C}_{\text{Ar}}$ ). Anal calc. for  $\text{C}_{20}\text{H}_{13}\text{NO}_4$ : C 72.50, H 3.95, N 4.23 %; Found: C 72.52, H 3.94, N 4.22 %. TOF MS calcd for  $\text{C}_{20}\text{H}_{13}\text{NO}_4$  331.32, found 331.41.

## 2.2 Synthesis of Zn-PDA.

A mixture of 9-phenylcarbazole-3,6-dicarboxylic acid ( $\text{H}_2\text{PDA}$ ) (40 mg, 62.5 mM) and  $\text{Zn}(\text{NO}_3)_2 \cdot 6\text{H}_2\text{O}$  (75 mg, 125 mM) were dissolved in dimethylformamide/methanol (9/1, 10 mL) in a screw capped vial. The resulting mixture was placed in an oven at 100 °C for 3 days. Colorless crystals with block-shape were obtained after filtration. Yield: 75 %. Anal calc. for  $\text{C}_{21}\text{H}_{11}\text{NO}_8\text{Zn}$ : C 53.58, H 2.36, N 2.98%; Found: C 53.6, H 2.39, N 2.96%.

### 3. X-ray Crystallography (Single-crystal diffraction) and Characterizations.

#### 3.1 Crystal data of Zn-PDA:

$C_{21}H_{11}NO_8Zn$ ,  $M = 470.68$ , Monoclinic, space group  $C2/c$ ,  $a = 25.951(3)$ ,  $b = 11.8662(14)$ ,  $c = 20.436(4)$  Å,  $\alpha = 90.00$ ,  $\beta = 125.847(6)$ ,  $\gamma = 90.00$ ,  $V = 5101.1(13)$  Å<sup>3</sup>,  $Z = 8$ ,  $D_c = 1.226$  g cm<sup>-3</sup>,  $\mu(\text{Mo-K}\alpha) = 0.71073$  mm<sup>-1</sup>,  $T = 296(2)$  K. 4481 unique reflections [ $R_{\text{int}} = 0.0773$ ]. Final  $R_1[\text{with } I > 2\sigma(I)] = 0.0758$ ,  $wR_2(\text{all data}) = 0.2699$ , GOOF = 1.002. CCDC number: 1009908.

#### 3.2 Crystallography:

Intensities were collected on a Bruker SMART APEX CCD diffractometer with graphite-monochromated Mo-K $\alpha$  ( $\lambda = 0.71073$  Å) using the SMART and SAINT programs. The structure was solved by direct methods and refined on  $F^2$  by full-matrix least-squares methods with SHELXTL *version* 5.1. Non-hydrogen atoms of the ligand backbones were refined anisotropically. Hydrogen atoms within the ligand backbones were fixed geometrically at calculated positions and allowed to ride on the parent non-hydrogen atoms.

**3.3 Figure S1** The coordination configuration of the Zn(1) centre in Zn-PDA. The asymmetric mode: A, 1-x, y, -1.5-z; B, 1.5 -x, 1.5-y, z; C, -0.5+x, 1.5-y, -0.5-z.

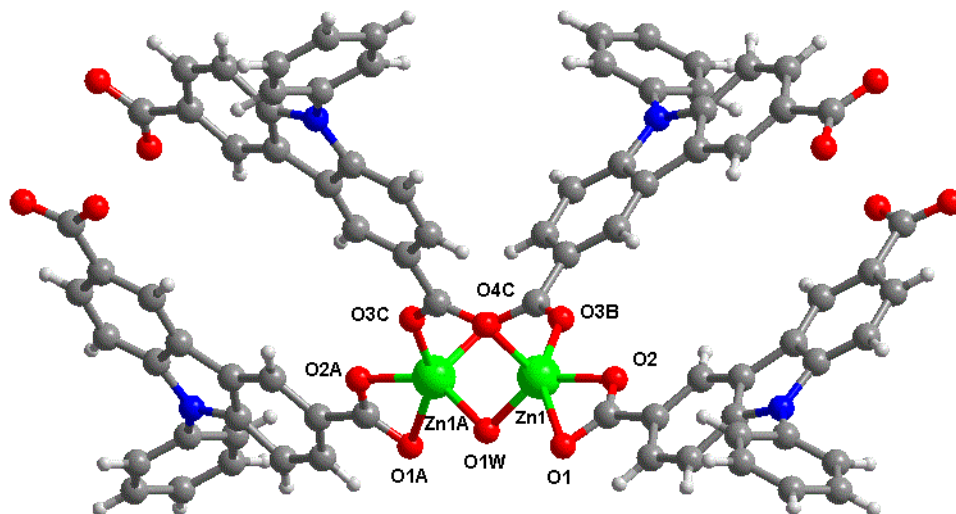

**3.4** Selective bond distance (Å) and angle (°) in Zn-PDA.

Selective bond distance (Å): Zn(1)-O(1W) 1.929(4), Zn(1)-O(2) 1.937(5), Zn(1)-O(3B) 1.994(4), Zn(1)-O(4C) 2.031(4).

Selective bond angle (°): O(1W)-Zn(1)-O(2) 138.5(2), O(1W)-Zn(1)-O(3B) 102.94(18), O(2)-Zn(1)-O(3B) 97.81(19), O(1W)-Zn(1)-O(4C) 104.63(16), O(2)-Zn(1)-O(4C) 106.95(19), O(3B)-Zn(1)-O(4C) 99.2(2).

**3.5 Figure S2** PXRD patterns of the as-synthesized (red), the simulated from single X-ray crystal structure (black).

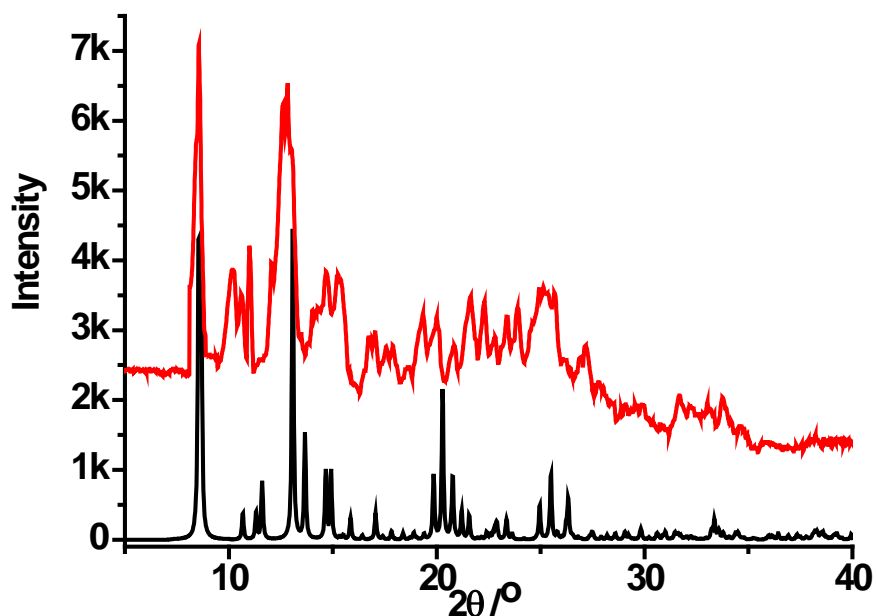

**3.6 Figure S3** TGA traces of Zn-PDA ranging from room temperature to 500 °C

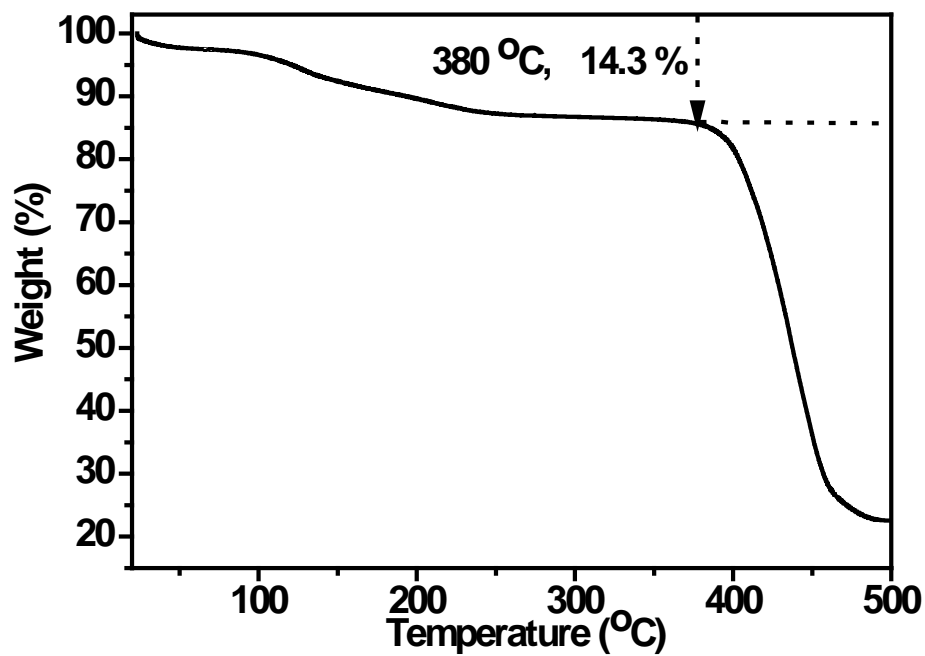

#### 4. Studies on the nitro-explosives detection based on Zn-PDA.

4.1 FigureS4 The PL spectra of 250 ppm Zn-PDA in ethanol solvent when excited at 342 nm.

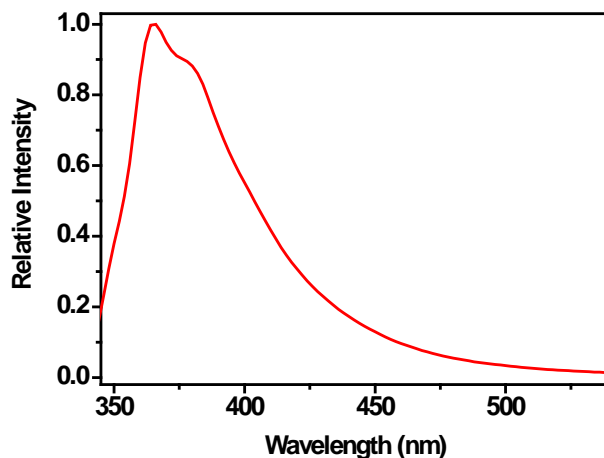

4.2 Figure S5 Families of various fluorescence spectra of 250 ppm Zn-PDA in ethanol solution upon the addition of 0.35 mM of different selected analytes.

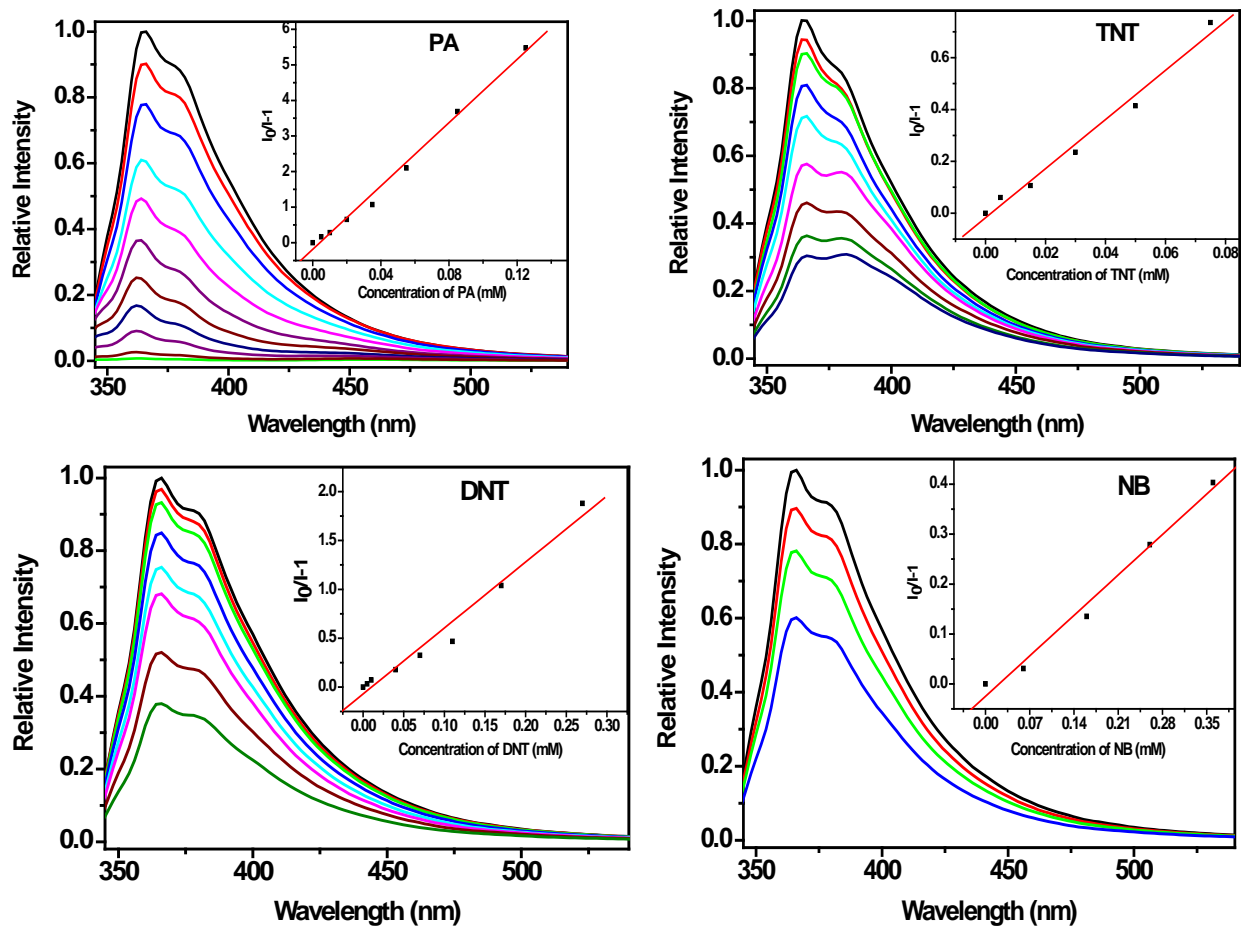



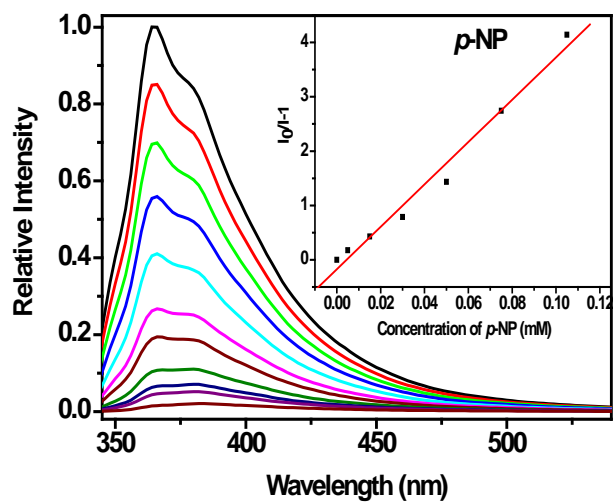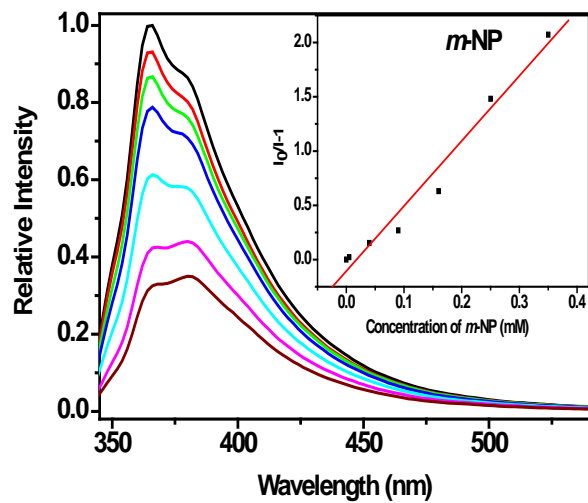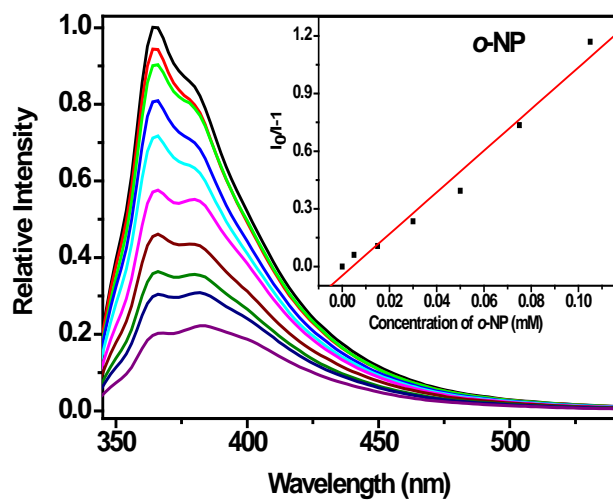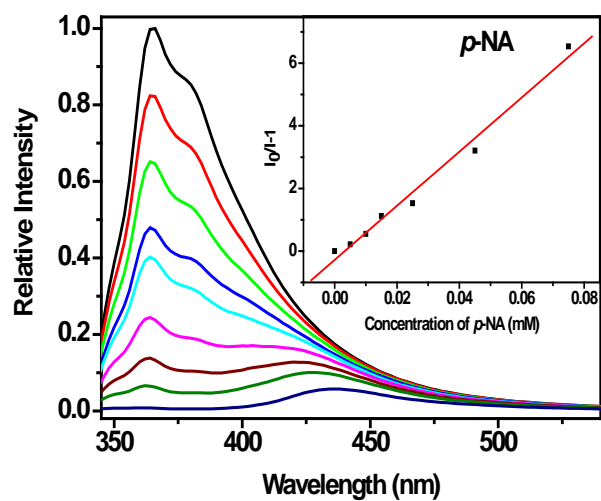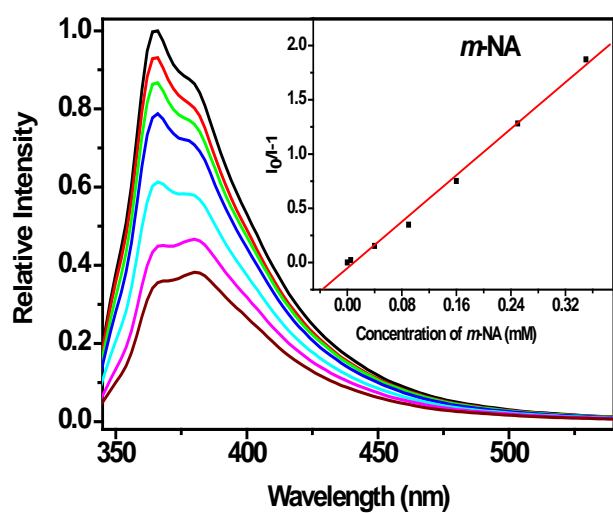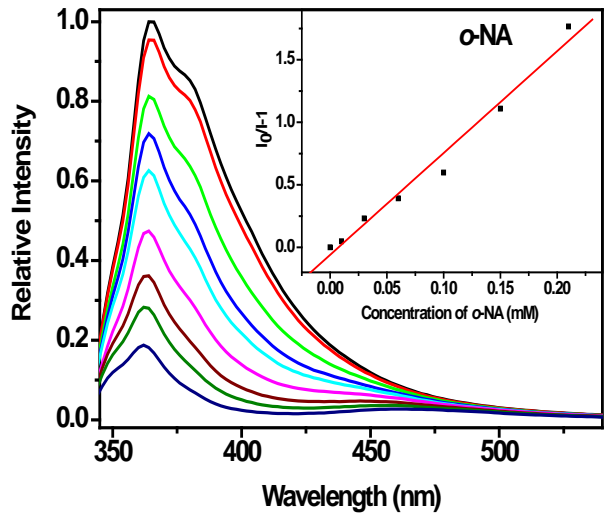

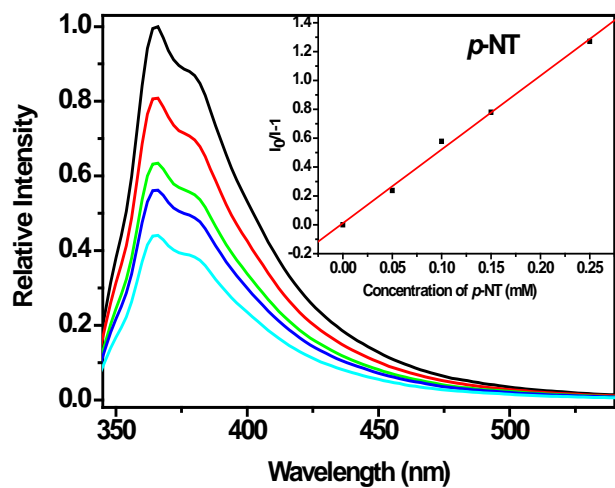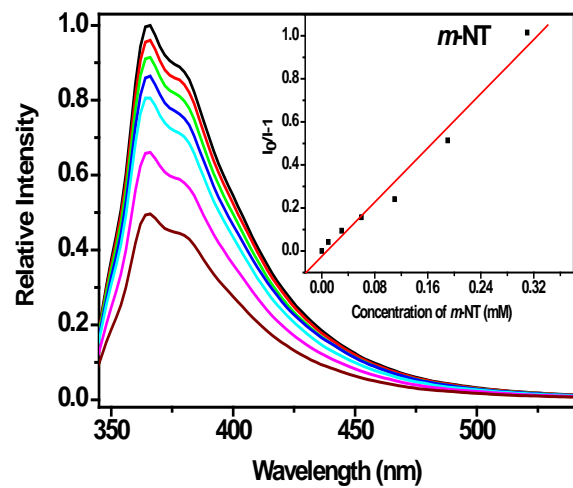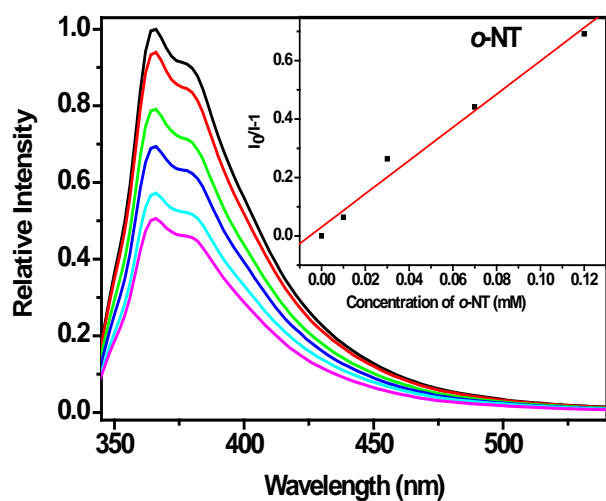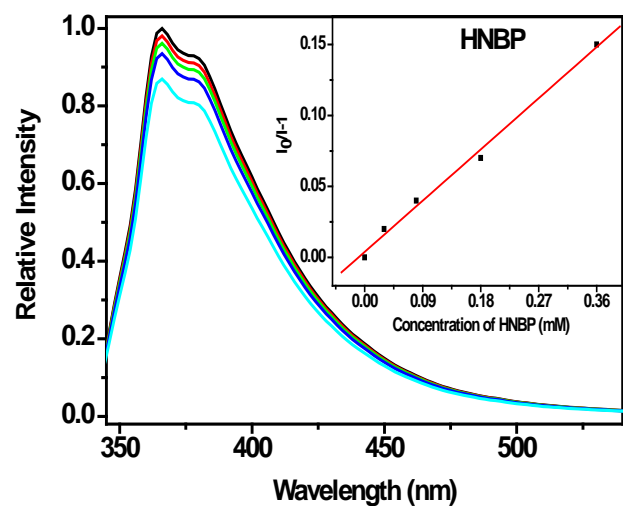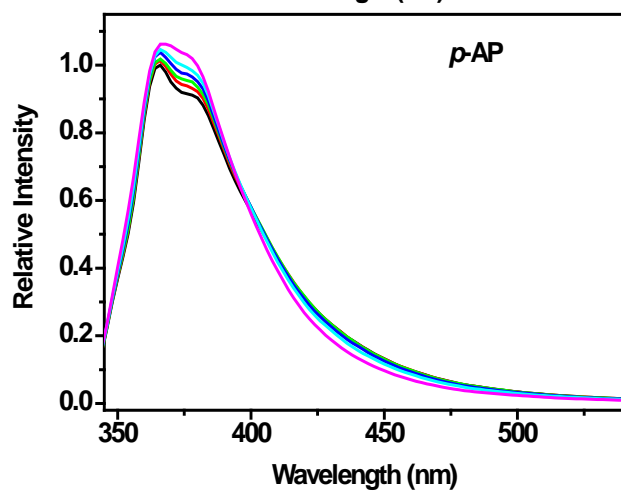

**4.3 Table S1** Summary of linear correlation coefficients ( $R$ ), quenching constants ( $K_{sv}$ ) for the Zn-PDA for the sensing of various nitroaromatics at room temperature.

| Analysts                                           | Molecular structure                                                                 | $R$   | $K_{sv}$ ( $M^{-1}$ ) |
|----------------------------------------------------|-------------------------------------------------------------------------------------|-------|-----------------------|
| Picric Acid<br>( <b>PA</b> )                       | 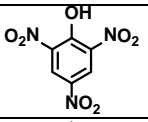   | 0.997 | 44501.8               |
| 2,4,6-Trinitrotoluene<br>( <b>TNT</b> )            |    | 0.992 | 9482.7                |
| 2,4-dinitrotoluene<br>( <b>DNT</b> )               |    | 0.992 | 6753.2                |
| Nitrobenzene<br>( <b>NB</b> )                      |    | 0.993 | 1157.4                |
| <i>p</i> -Nitrophenol<br>( <i>p</i> - <b>NP</b> )  |    | 0.991 | 38973.8               |
| <i>o</i> -Nitrophenol<br>( <i>o</i> - <b>NP</b> )  |   | 0.991 | 10830.2               |
| <i>m</i> -Nitrophenol<br>( <i>m</i> - <b>NP</b> )  |  | 0.991 | 5997.6                |
| <i>p</i> -Nitroaniline<br>( <i>p</i> - <b>NA</b> ) |  | 0.992 | 43424.2               |
| <i>o</i> -Nitroaniline<br>( <i>o</i> - <b>NA</b> ) |  | 0.990 | 8141.2                |
| <i>m</i> -Nitroaniline<br>( <i>m</i> - <b>NA</b> ) |  | 0.996 | 5622.2                |
| <i>p</i> -Nitrotoluene<br>( <i>p</i> - <b>NT</b> ) |  | 0.998 | 5107.2                |
| <i>o</i> -Nitrotoluene<br>( <i>o</i> - <b>NT</b> ) |  | 0.990 | 5684.9                |
| <i>m</i> -Nitrotoluene<br>( <i>m</i> - <b>NT</b> ) |  | 0.990 | 3149.5                |
| 4-Hydroxy-4'-nitrobiphenyl<br>( <b>HNBP</b> )      |  | 0.997 | 400.9                 |
| <i>p</i> -Aminophenol<br>( <i>p</i> - <b>AP</b> )  |  | -     | -                     |

**4.4 Figure S6** FT-IR spectra of *p*-NA (top), Zn-PDA obtained after the absorption of *p*-NA (middle) and Zn-PDA (bottom).

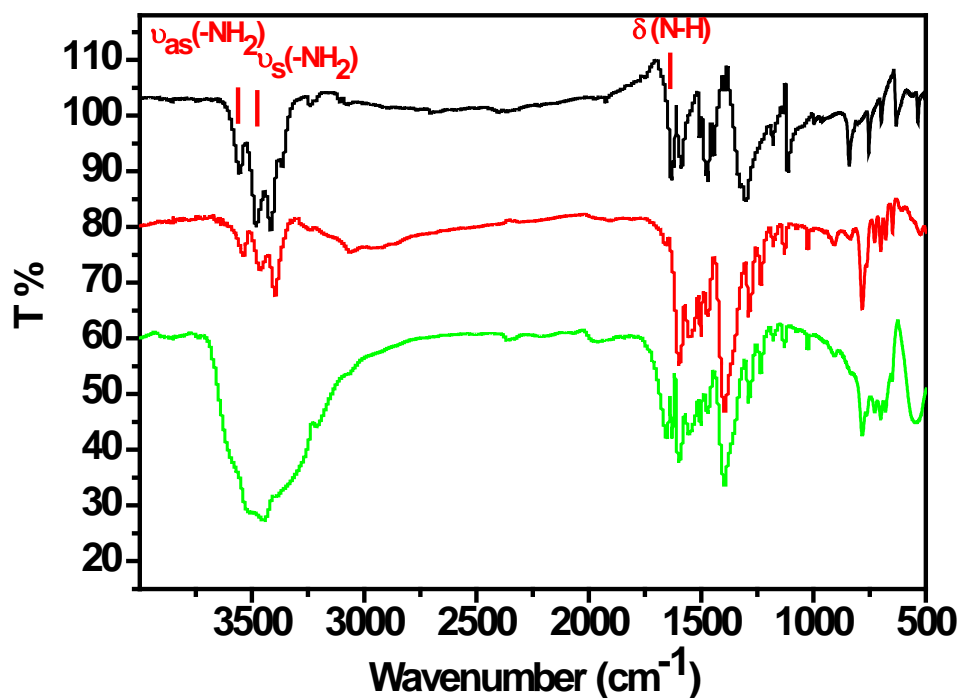

| Compounds                     | $\nu_{\text{as}}(-\text{NH}_2)$ ( $\text{cm}^{-1}$ ) <sup>S2</sup> | $\nu_{\text{s}}(-\text{NH}_2)$ ( $\text{cm}^{-1}$ ) | $\delta(\text{N-H})$ ( $\text{cm}^{-1}$ ) |
|-------------------------------|--------------------------------------------------------------------|-----------------------------------------------------|-------------------------------------------|
| <i>p</i> -NA                  | 3558.1                                                             | 3481.2                                              | 1634.8                                    |
| Zn-PDA $\supset$ <i>p</i> -NA | 3534.5                                                             | 3468.4                                              | 1596.1                                    |

## 5. References.

S1. J.Wang, C. He, P. Y. Wu, J. Wang, C. Y. Duan, *J. Am. Chem. Soc.*, 2011, **133**, 12402.

S2. U. Okwieka, K. H. Natkaniec, T. Misiaszek, W. Medycki, J. Baran and M. M. Szostak, *J. Chem. Phys.*, 2009, **131**, 144505.
